# Supplementary material for: Developing, implementing, and monitoring tailored strategies for integrated knowledge translation in five sub-Saharan African countries
Source: PubMed Central journal article supplement (PMC10478471; doi:10.1186/s12961-023-01038-x), 2023-09-04
Supplement: 12961_2023_1038_MOESM1_ESM.pdf [file 12961_2023_1038_MOESM1_ESM.pdf]

## **Overview of CEBHA+ research tasks and activities**

|                                                                                                                                                                                                |                                                                                                                                                                                                 |
|------------------------------------------------------------------------------------------------------------------------------------------------------------------------------------------------|-------------------------------------------------------------------------------------------------------------------------------------------------------------------------------------------------|
| <b>Research task 1: Evidence-informed policies and practices on screening approaches for hypertension and diabetes, and those at high risk of cardiovascular disease in sub-Saharan Africa</b> |                                                                                                                                                                                                 |
| 1.1                                                                                                                                                                                            | Review of existing evidence on the effectiveness of different screening approaches for hypertension and diabetes in low- and middle income countries (LMICs)                                    |
| 1.2                                                                                                                                                                                            | Conduct a robust evaluation of the use of the total non-laboratory CVD risk score                                                                                                               |
| 1.3                                                                                                                                                                                            | Prepare evidence-informed policy briefs and have policy dialogues                                                                                                                               |
| <b>Research task 2: Evidence-informed policies and practices on integrated models of healthcare delivery for hypertension and diabetes in sub-Saharan Africa</b>                               |                                                                                                                                                                                                 |
| 2.1                                                                                                                                                                                            | Determine the prevalence of diabetes, hypertension and depression amongst HIV-positive people receiving Antiretroviral Therapy (ART)                                                            |
| 2.2                                                                                                                                                                                            | Review existing evidence on integration of care for hypertension and diabetes                                                                                                                   |
| 2.3                                                                                                                                                                                            | Review existing evidence on integration of care for other diseases                                                                                                                              |
| 2.4                                                                                                                                                                                            | Prepare evidence-informed policy briefs and have policy dialogues                                                                                                                               |
| 2.5                                                                                                                                                                                            | Implement a comprehensive approach to patient education and counselling for patients with non-communicable chronic diseases in primary care                                                     |
| <b>Research task 3: Evidence-informed policies and practices on population-level interventions to prevent diabetes and hypertension in sub-Saharan Africa</b>                                  |                                                                                                                                                                                                 |
| 3.1                                                                                                                                                                                            | Undertake a systematic review of the effectiveness of population-level interventions to prevent diabetes and hypertension in low- and middle-income countries                                   |
| 3.2                                                                                                                                                                                            | Conduct a situational analysis to identify population-level interventions currently being implemented in Malawi, South Africa and Rwanda                                                        |
| 3.3                                                                                                                                                                                            | Evaluate the implementation of two selected ongoing population-level interventions targeting risk factors for diabetes and hypertension, one in Rwanda and one in either Malawi or South Africa |

|                                                                                                                                  |                                                                                                                                                                                 |
|----------------------------------------------------------------------------------------------------------------------------------|---------------------------------------------------------------------------------------------------------------------------------------------------------------------------------|
| 3.4                                                                                                                              | Prepare evidence-informed policy briefs and have policy dialogues and stakeholder engagement with policy-makers and healthcare professionals                                    |
| <b>Research task 4: Finding the evidence for improved implementation of road traffic injury prevention interventions</b>         |                                                                                                                                                                                 |
| 4.1                                                                                                                              | Collect and assess the quality of currently available data on the epidemiology of road traffic injuries                                                                         |
| 4.2                                                                                                                              | Identify key policy and programmatic aspects in the design, implementation and evaluation of existing interventions to reduce the incidence of pedestrian road traffic injuries |
| 4.3                                                                                                                              | Review the effectiveness of international pedestrian-targeted interventions to prevent the occurrence of road traffic injuries                                                  |
| 4.4                                                                                                                              | Evaluate the implementation of current pedestrian-targeted interventions to prevent occurrence of road traffic injuries in Rwanda and Uganda                                    |
| <b>Research task 5: Promotion of an integrated, rigorous methodological approach across CEBHA+ research tasks and activities</b> |                                                                                                                                                                                 |
| 5.1                                                                                                                              | Implement an integrated approach from research conceptualisation to implementation of findings that engages decision-makers throughout the research process                     |
| 5.2                                                                                                                              | Ensure highest possible scientific rigour for all types of research conducted under CEBHA+                                                                                      |
| 5.3                                                                                                                              | Evaluate enhanced competence of CEBHA+ researchers and higher-quality research output                                                                                           |
| 5.4                                                                                                                              | Assess added value of the CEBHA+ research co-production approach                                                                                                                |
