# Supplementary material for: Developing, implementing, and monitoring tailored strategies for integrated knowledge translation in five sub-Saharan African countries
Source: PubMed Central journal article supplement (PMC10478471; doi:10.1186/s12961-023-01038-x), 2023-09-04
Supplement: 12961_2023_1038_MOESM2_ESM.pdf [file 12961_2023_1038_MOESM2_ESM.pdf]

**Additional file 2: Reflective Survey**

| TIDieR checklist item | Description                                                                      | Corresponding question in Survey                                                                                                                                                            |
|-----------------------|----------------------------------------------------------------------------------|---------------------------------------------------------------------------------------------------------------------------------------------------------------------------------------------|
| Item 1: Brief name    |                                                                                  |                                                                                                                                                                                             |
| Item 2: Why?          | Rationale, theory, or goal of the elements essential to the intervention         | What was the rationale you and your colleagues had in mind when developing the site specific IKT strategy? (late 2018/early 2019)                                                           |
| Item 3: What?         | Materials used in the intervention and in the training of intervention providers | Procedures: Please select the respective steps you and your colleagues pursued and/or participated in when developing, implementing and monitoring your IKT strategy. Check all that apply. |
|                       |                                                                                  | Materials: Please select all materials you used to DEVELOP and UPDATE your IKT strategy                                                                                                     |
|                       |                                                                                  | Please add any other materials you used to DEVELOP and UPDATE your IKT strategy                                                                                                             |
|                       |                                                                                  | Please select all the materials you used to MONITOR your IKT strategy.                                                                                                                      |
|                       |                                                                                  | Please add any other materials you used to MONITOR your IKT strategy                                                                                                                        |
|                       |                                                                                  | Please feel free to add other steps you undertook when developing or updating the IKT                                                                                                       |

|                      |                                                                                                                                                                                           |                                                                                                                                                                                          |
|----------------------|-------------------------------------------------------------------------------------------------------------------------------------------------------------------------------------------|------------------------------------------------------------------------------------------------------------------------------------------------------------------------------------------|
|                      |                                                                                                                                                                                           | strategy.                                                                                                                                                                                |
|                      |                                                                                                                                                                                           | Feel free to share any reflections or insights about the development or updating of the IKT strategy.                                                                                    |
| Item 4: Who provided | For each category of intervention provider (such as CEBHA IKT Focal Points, CEBHA+ researchers, CEBHA+ PIs/Co-PIs), describe their expertise, background, and any specific training given | Provider: Who engaged with stakeholders (i.e. implemented the IKT strategy) at your site?<br>Check all that apply.                                                                       |
|                      |                                                                                                                                                                                           | Provider: Who else engaged with stakeholders at your site?                                                                                                                               |
|                      |                                                                                                                                                                                           | Provider: Which expertise regarding IKT did the IKT focal point have?                                                                                                                    |
|                      |                                                                                                                                                                                           | Provider: Which expertise regarding IKT did the other people who engaged with stakeholders have (e.g. previous experience in stakeholder engagement)?<br>Please indicate a team average. |
|                      |                                                                                                                                                                                           | Provider: In your team, which training did the persons who engaged with stakeholders receive (e.g. IKT workshop, issue brief workshop, online resources)? Check all that apply.          |
| Item 5: How?         |                                                                                                                                                                                           | Describe the modes of delivery (such as face to face or by some other mechanism, such as internet or telephone) of the intervention and whether it was provided                          |
|                      |                                                                                                                                                                                           | Please add any other modes you used to interact with stakeholders at your site.                                                                                                          |
|                      |                                                                                                                                                                                           | How did you interact with your CEBHA+ colleagues at your site? Please select all that apply.                                                                                             |

|                          |                                                                                                                  |                                                                                                                                                                                                     |
|--------------------------|------------------------------------------------------------------------------------------------------------------|-----------------------------------------------------------------------------------------------------------------------------------------------------------------------------------------------------|
|                          | individually or in a group                                                                                       | Please add any other modes of how you interact with CEBHA+ colleagues at your site.                                                                                                                 |
| Item 6:<br>Where?        | Types of Locations where the intervention occurred, including any necessary infrastructure or relevant features  | Please indicate the city, cities or regions in which the IKT strategy was implemented                                                                                                               |
|                          |                                                                                                                  | Please indicate if there was relevant (I)KT infrastructure available that you used to implement your IKT strategy (e.g. national KT platform, KT conference, KT social media channels, KT networks) |
| Item 7:<br>Tailoring?    | If the IKT strategy was planned to be personalised, then describe what, why, when, and how                       | To what extent was your IKT strategy tailored to the individual stakeholders                                                                                                                        |
|                          |                                                                                                                  | Please describe how you personalised or tailored the IKT strategies to respective stakeholders. Feel free to provide examples!                                                                      |
|                          |                                                                                                                  | To what extent was your IKT strategy modified during the course of CEBHA+? i.e. Did you add or remove stakeholders from your strategy? Did you change the mode of engagement?                       |
| Item 8:<br>Modifications | If the IKT strategy was modified during the course of the study, describe the changes (what, why, when, and how) | For what reasons were your IKT strategies modified? Please select all that apply.                                                                                                                   |
|                          |                                                                                                                  | Please add other reasons why you had to modify your IKT strategies.                                                                                                                                 |
| Item 9: How well         | How well you planned and actually implemented your IKT strategy                                                  | Compared to how you originally planned your IKT strategy, to what extent did you adhere to this strategy?                                                                                           |
